# Supplementary material for: Constructing a crystalline–amorphous hydrated niobium pentoxide homojunction for superior photocatalytic CO2 reduction into CH4 with high selectivity
Source: Royal Society of Chemistry journal article supplement (doi:10.1039/d3cy00806a), 2023-01-01
Supplement: d3cy00806a1.pdf [file d3cy00806a1.pdf]

## ***Supporting Information***

# **Constructing crystalline-amorphous hydrated niobium pentoxide homojunction for superior photocatalytic CO<sub>2</sub> reduction into CH<sub>4</sub> with high selectivity**

Fengyun Su<sup>\*a</sup>, Zhishuai Wang<sup>a</sup>, Mengzhen Tian<sup>a</sup>, Kecheng Liu<sup>a</sup>, Haiquan Xie<sup>a</sup>,  
Wenguang Tu<sup>\*b</sup>, Yezhen Zhang<sup>a</sup>, Xiang Li<sup>a</sup>, Xiaoli Jin<sup>a</sup>, Xin Ying Kong<sup>\*c</sup>

<sup>a</sup> Engineering Technology Research Center of Henan Province for Solar Catalysis; College of Chemistry and Pharmaceutical Engineering, Nanyang Normal University, Nanyang 473061, P. R. China.

<sup>b</sup> School of Science and Engineering, The Chinese University of Hong Kong, Shenzhen, Guangdong 518172, P. R. China.

<sup>c</sup> School of Chemistry, Chemical Engineering and Biotechnology, Nanyang Technological University, Singapore, 21 Nanyang Link, 637371 Singapore.

### **Corresponding author**

E-mail: [SuFY0407@163.com](mailto:SuFY0407@163.com) (F. Y. Su), [tuwenguang@cuhk.edu.cn](mailto:tuwenguang@cuhk.edu.cn) (W. G. Tu), [xinyingk@gmail.com](mailto:xinyingk@gmail.com) (X. Y. Kong)

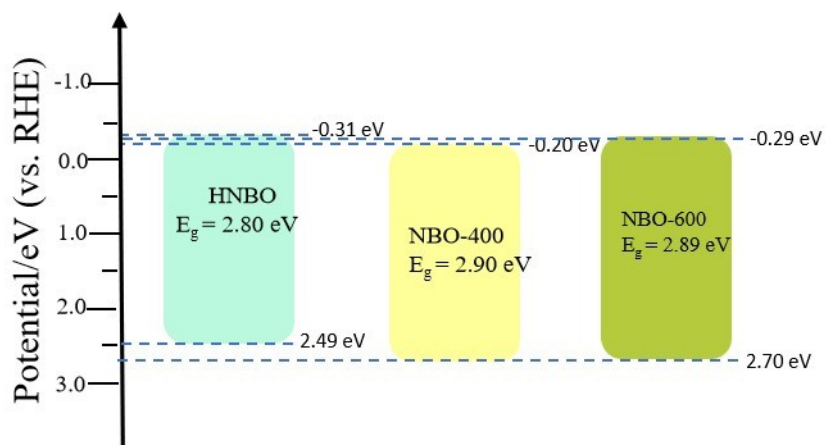

Fig. S1 Band structure of HNBO, NBO-400, and NBO-600.

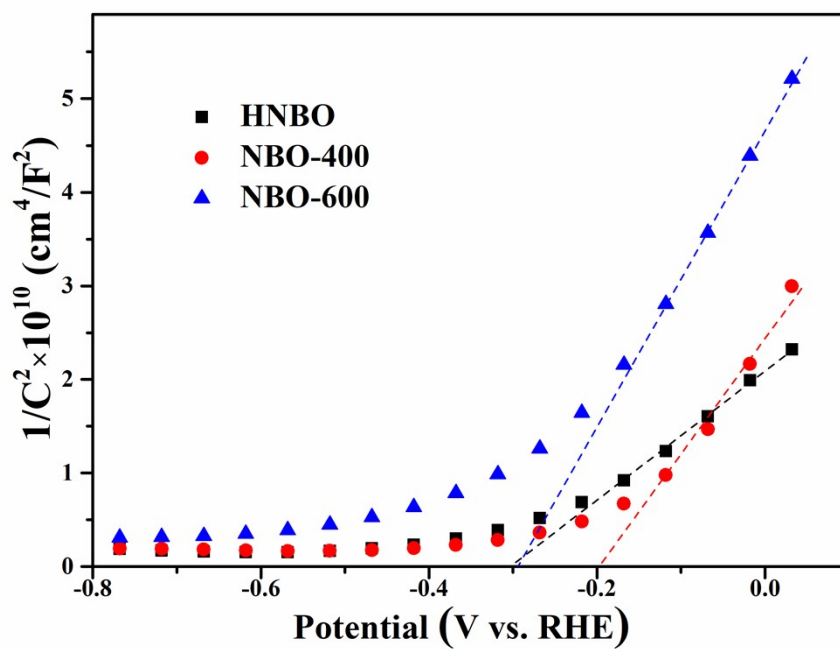

Fig. S2 Mott-Schottky plots of HNBO, NBO-400, and NBO-600

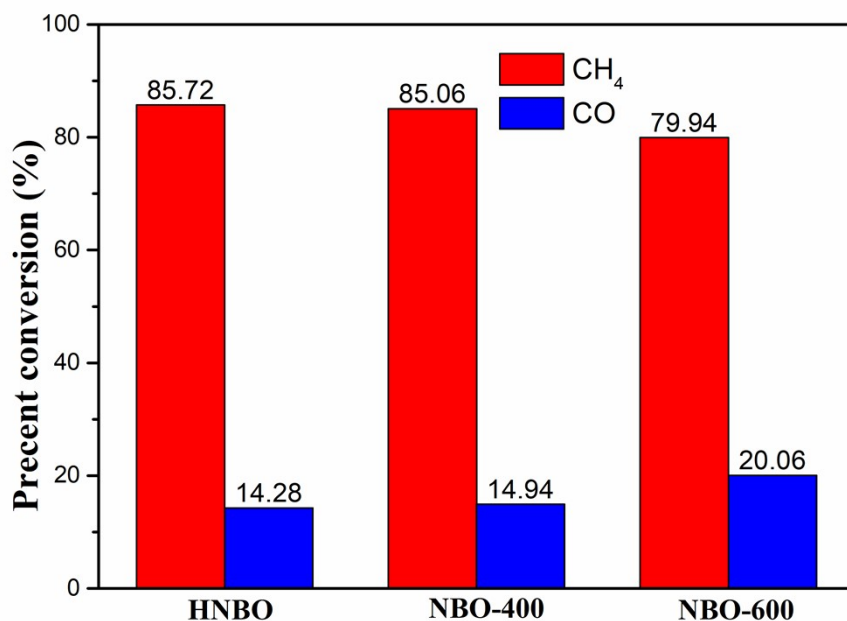

**Fig. S2** CH<sub>4</sub> and CO selectivity comparison over HNBO, NBO-400, and NBO-600.

**Table S1** Comparison of CO<sub>2</sub> photoreduction activity and selectivity for CH<sub>4</sub> over HNBO with other representative works reported in the literature.

| Photocatalytic Materials                                                        | Light Source       | Reaction condition             | Production rate of CH <sub>4</sub> | Selectivity of CH <sub>4</sub> | Ref.      |
|---------------------------------------------------------------------------------|--------------------|--------------------------------|------------------------------------|--------------------------------|-----------|
| HBNO                                                                            | 300 W Xe lamp      | Gas-solid, H <sub>2</sub> O    | 31.39 μmol/g/h                     | 85.7%                          | This work |
| Bi <sub>4</sub> O <sub>5</sub> Br <sub>2</sub> /AgBr                            | 300 W Xe lamp      | Gas-solid, H <sub>2</sub> O    | 1.8 μmol/g/h                       | 21.9%                          | [1]       |
| O-doped g-C <sub>3</sub> N <sub>4</sub> /N-doped Nb <sub>2</sub> O <sub>5</sub> | 300 W Xe lamp      | Gas-solid, H <sub>2</sub> O    | 68.11 μmol/g/h                     | 21.1%                          | [2]       |
| NiO <sub>x</sub> /Nb <sub>2</sub> O <sub>5</sub>                                | UV light           | Gas-solid, H <sub>2</sub> O    | 138.9 μmol/g/h                     | 40.9%                          | [3]       |
| g-C <sub>3</sub> N <sub>4</sub> /Pt/(TiO <sub>2</sub> @carbon)                  | Simulated sunlight | Gas-solid, H <sub>2</sub> O    | 6.56 μmol/g/h                      | 81.7%                          | [4]       |
| MoO <sub>2</sub> /g-C <sub>3</sub> N <sub>4</sub>                               | 300 W Xe lamp      | Gas-solid, H <sub>2</sub> O    | 0.145 μmol/g/h                     | 20.3%                          | [5]       |
| CuO/Nb <sub>2</sub> O <sub>5</sub>                                              | UV light           | Liquid-solid, H <sub>2</sub> O | 2 μmol/g/h                         | 68.6%                          | [6]       |
| Black Nb <sub>2</sub> O <sub>5-x</sub>                                          | 300 W Xe lamp      | Liquid-solid, H <sub>2</sub> O | 19.5 μmol/g/h                      | 64.8%                          | [7]       |

[1] Jin, X.; Cao, J.; Wang, H.; Lv, C.; Xie, H.; Su, F.; Li, X.; Sun, R.; Shi, S.; Dang, M.; Ye, L. Realizing improved CO<sub>2</sub> photoreduction in Z-scheme Bi<sub>4</sub>O<sub>5</sub>Br<sub>2</sub>/AgBr heterostructure. Appl.

Surf. Sci. 2022, 598, 153758.

- [2] Qaraah, F. A.; Mahyoub, S. A.; Hezam, A.; Qaraah, A.; Xin, F.; Xiu, G. Synergistic effect of hierarchical structure and S-scheme heterojunction over O-doped g-C<sub>3</sub>N<sub>4</sub>/N-doped Nb<sub>2</sub>O<sub>5</sub> for highly efficient photocatalytic CO<sub>2</sub> reduction. *Appl. Catal. B: Environ.* 2022, 315, 121585.
- [3] Wang, Z.; Xiao, M.; Wang, X.; Wang, H.; Chen, X.; Dai, W.; Yu, Y.; Fu, X. Thermo-driven photocatalytic CO<sub>2</sub> hydrogenation over NiO<sub>x</sub>/Nb<sub>2</sub>O<sub>5</sub> via regulating the electron transfer behavior of reactant gas adsorption. *Appl. Surf. Sci.* 2022, 592, 153246.
- [4] Wang, C.; Liu, X.; He, W.; Zhao, Y.; Wei, Y.; Xiong, J.; L, J.; Li, J.; Song, W.; Zhang, X.; Zhao, Z. All-solid-state Z-scheme photocatalysts of g-C<sub>3</sub>N<sub>4</sub>/Pt/macroporous-(TiO<sub>2</sub>@ carbon) for selective boosting visible-light-driven conversion of CO<sub>2</sub> to CH<sub>4</sub>. *J Catal.* 2020, 389, 440-449.
- [5] Li, H. J. W.; Zhou, H.; Chen, K.; Liu, K.; Li, S.; Jiang, K.; Zhang, W.; Xie, Y.; Cao, Z.; Li, H.; Liu, H.; Xu, X.; Pan, H.; Hu, J.; Tang, D.; Qiu, X.; Fu, J.; Liu, M. Metallic MoO<sub>2</sub>-modified graphitic carbon nitride boosting photocatalytic CO<sub>2</sub> reduction via Schottky junction. *Solar Rrl.* 2020, 4(8), 1900416.
- [6] Nogueira, A. E.; Silva, G. T.; Oliveira, J. A.; Lopes, O. F.; Torres, J. A.; Carmo, M.; Ribeiro, C. CuO decoration controls Nb<sub>2</sub>O<sub>5</sub> photocatalyst selectivity in CO<sub>2</sub> reduction. *ACS Appl. Energy Mater.* 2020, 3(8), 7629-7636.
- [7] Lin, X.; Xia, S.; Zhang, L.; Zhang, Y.; Sun, S.; Chen, Y.; Chen, S.; Ding, B.; Yu, J.; Yan, J. Fabrication of Flexible Mesoporous Black Nb<sub>2</sub>O<sub>5</sub> Nanofiber Films for Visible - Light - Driven Photocatalytic CO<sub>2</sub> Reduction into CH<sub>4</sub>. *Adv. Mater.* 2022, 34(16), 2200756.
